# Supplementary material for: Genome-wide association study of kernel moisture content at harvest stage in maize
Source: PubMed Central journal article supplement — Breed Sci. 2018 Nov 23;68(5):622–8. doi: 10.1270/jsbbs.18102 (PMC6345239; doi:10.1270/jsbbs.18102), 2018-11-23
Supplement: 68_18102_1.pdf [file 68_18102_1.pdf]

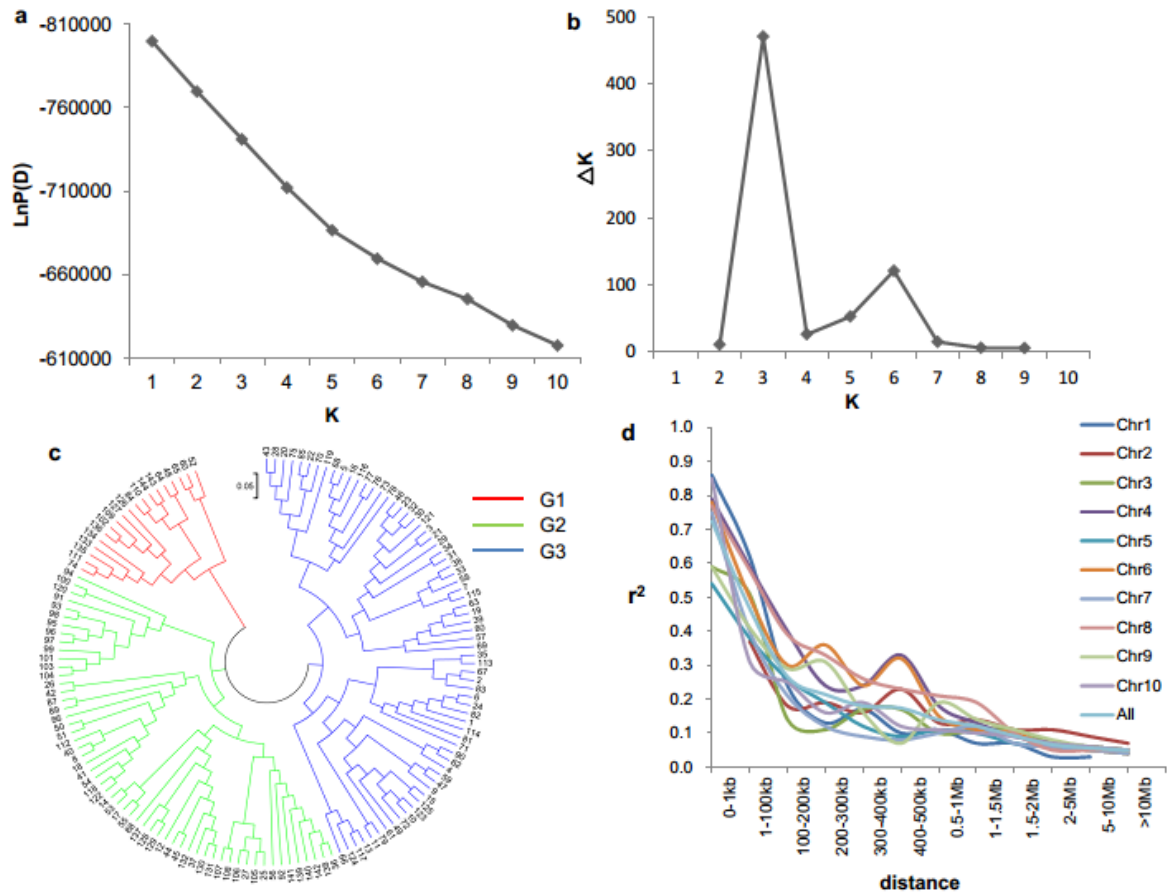

**Supplemental Fig. 1.** Population structure analysis and linkage disequilibrium of 144 maize inbred lines.

**a** Estimated  $\text{LnP}(D)$  in the STRUCUTRE analysis. **b** Estimated  $\Delta k$  in the STRUCUTRE analysis. **c** Neighbor-joining tree of 144 maize inbred lines. **d** Linkage disequilibrium across the 10 chromosomes.
