# Supplementary material for: Genome-wide association study of kernel moisture content at harvest stage in maize
Source: PubMed Central journal article supplement — Breed Sci. 2018 Nov 23;68(5):622–8. doi: 10.1270/jsbbs.18102 (PMC6345239; doi:10.1270/jsbbs.18102), 2018-11-23
Supplement: 68_18102_2.pdf [file 68_18102_2.pdf]

**Supplemental Table 1.** The origin or pedigree, subpopulation and phenotype of 144 maize inbred lines used in this study

| ID. | Inbred line | Origin/Pedigree                               | Sub-population | BLUP value (%) |
|-----|-------------|-----------------------------------------------|----------------|----------------|
| 1   | T477        | (T75×YJ7) ×YJ7                                | G3             | 35.43          |
| 2   | T437        | T75×YJ7                                       | G3             | 37.75          |
| 3   | T458        | Unknown                                       | G3             | 36.93          |
| 4   | T75         | 8112×YJ7                                      | G3             | 24.05          |
| 5   | 4A          | Derived from synthetic variety                | G3             | 25.44          |
| 6   | T877        | (YJ7×E28) ×YJ7                                | G3             | 30.75          |
| 7   | Su951       | Ye478×Ji183                                   | G3             | 34.71          |
| 8   | Chang7-2    | (V59×Huangzaosi)×S901                         | G2             | 29.35          |
| 9   | Nongda1145  | Recycled line from hybrid 78599               | G3             | 38.21          |
| 10  | Qi319       | Recycled line from hybrid 78599               | G3             | 33.84          |
| 11  | T249        | 5U×P6C1                                       | G3             | 35.12          |
| 12  | 9409        | Derived from Su951                            | G2             | 34.71          |
| 13  | Dan598      | Dan340×78599                                  | G3             | 38.94          |
| 14  | HL40        | Derived from synthetic variety                | G2             | 29.05          |
| 15  | Sheng137    | Derived from 6JK111                           | G3             | 33.32          |
| 16  | 4AC         | 4A×HuangC                                     | G3             | 33.06          |
| 17  | S651        | Recycled line from hybrid 78599               | G2             | 33.94          |
| 18  | Wu314       | (302×Huangbaoli)×Huangzaosi                   | G2             | 29.15          |
| 19  | T812        | Derived from U8                               | G3             | 32.50          |
| 20  | F2          | Derived from synthetic variety                | G3             | 38.78          |
| 21  | Xin19M      | Derived from mutant of Ye478                  | G3             | 38.52          |
| 22  | Zheng58     | Derived from mutant of Ye478                  | G3             | 35.28          |
| 23  | H991        | Ye478×5003                                    | G3             | 37.49          |
| 24  | YJ7         | Recycled line from hybrid 78599               | G3             | 35.28          |
| 25  | N18         | Maize inbred line of N18 from U.S.            | G2             | 32.65          |
| 26  | N3          | Maize inbred line of N3 from U.S.             | G2             | 39.35          |
| 27  | N21         | Maize inbred line of N21 from U.S.            | G2             | 37.96          |
| 28  | Dan340      | Baizhulu-9×wild maize                         | G3             | 33.12          |
| 29  | K22         | K11×Ye478                                     | G3             | 37.75          |
| 30  | T803        | 8112×5003                                     | G3             | 31.52          |
| 31  | C8605       | 7922×5003                                     | G3             | 37.13          |
| 32  | Ye478       | 8112×5003                                     | G3             | 36.46          |
| 33  | HuangC      | (Huangxiao162/o2×Zi330/o2)×Tuxpeno-1          | G3             | 39.40          |
| 34  | 7922        | Recycled line from hybrid 3382                | G3             | 37.54          |
| 35  | DH02        | Derived from Mixed Population of Lv28 and Lv9 | G3             | 37.65          |
| 36  | Mo17        | 187-2×103                                     | G2             | 32.70          |
| 37  | Zi330       | OH43×Keli67                                   | G2             | 37.54          |
| 38  | DH65232     | 6237×5003                                     | G3             | 33.84          |
| 39  | 8723        | Unknown                                       | G3             | 30.28          |

|    |            |                                     |    |       |
|----|------------|-------------------------------------|----|-------|
| 40 | Xun92-6    | Chang7-2×J7H                        | G2 | 32.39 |
| 41 | lx9801     | Ye502×H21                           | G2 | 36.26 |
| 42 | Y85        | 515×P78599                          | G2 | 39.04 |
| 43 | CCM        | Unknown                             | G3 | 27.40 |
| 44 | Zong3      | Derived from Zi330 Synthetic        | G2 | 26.78 |
| 45 | Zong31     | Derived from Zi330 Synthetic        | G2 | 35.02 |
| 46 | Xun248     | 78599×8085                          | G3 | 39.30 |
| 47 | T178       | Recycled line from hybrid 78599     | G3 | 33.94 |
| 48 | Zhong128   | 2118×Zhongzi7490                    | G1 | 38.47 |
| 49 | P138       | Recycled line from hybrid 78599     | G3 | 36.05 |
| 50 | Q1261      | Unknown                             | G2 | 37.08 |
| 51 | K12        | Huangzaosi×Weicunhuang              | G2 | 34.81 |
| 52 | ZGF        | Unknown                             | G1 | 40.43 |
| 53 | Zheng37    | Derived from Synthetic Population   | G2 | 28.79 |
| 54 | Huangzaosi | Tangsipingtou                       | G2 | 31.98 |
| 55 | Luyuan92   | Yuanqi123×1137                      | G2 | 25.39 |
| 56 | 107        | Derived from XL80                   | G2 | 35.59 |
| 57 | DH4866     | 7922×Ye478                          | G3 | 37.29 |
| 58 | JH78-2     | Recycled line from hybrid 78599     | G3 | 39.09 |
| 59 | JH3372     | Shen5003×Zi330                      | G3 | 37.49 |
| 60 | Zheng39    | (Ji533×Zheng32)×Ji533               | G1 | 35.28 |
| 61 | J2         | Recycled line from hybrid 78599     | G3 | 39.30 |
| 62 | T66        | 8112×78599                          | G3 | 32.75 |
| 63 | 568G       | 8112×78599                          | G3 | 34.87 |
| 64 | L162       | 8112×T75                            | G1 | 30.75 |
| 65 | H0424      | Unknown                             | G1 | 39.09 |
| 66 | Dongdan60  | Unknown                             | G3 | 31.31 |
| 67 | T1002      | (T75×78599)×(249+...)               | G3 | 39.14 |
| 68 | T1003      | 4S×S4                               | G3 | 26.86 |
| 69 | XianfengX  | Recycled line from hybrid Xianyu335 | G3 | 31.67 |
| 70 | T1004      | 4S×Zheng58                          | G3 | 30.75 |
| 71 | T1005      | Qi319×X7                            | G3 | 37.08 |
| 72 | T1006      | Recycled line from hybrid 78599     | G3 | 35.02 |
| 73 | T1007      | Shen137×4S                          | G3 | 32.03 |
| 74 | T2001      | Recycled line from hybrid Xianyu335 | G1 | 31.21 |
| 75 | T1008      | E28×CML×Dan340                      | G3 | 34.20 |
| 76 | T1009      | E28×CML×4S                          | G3 | 27.55 |
| 77 | T1010      | K12×CML×Dan340                      | G3 | 27.45 |
| 78 | T1011      | K12×CML×4S                          | G3 | 24.05 |
| 79 | T1012      | (5U×P6C1)×4S                        | G3 | 37.54 |
| 80 | T1013      | (568G×S3)×568G                      | G3 | 31.26 |
| 81 | T1014      | Zong3×T877                          | G3 | 36.41 |
| 82 | T1015      | T249×78599                          | G3 | 34.20 |
| 83 | T1016      | (T75×78599)×Chang7-2                | G3 | 33.68 |

|     |         |                                         |    |       |
|-----|---------|-----------------------------------------|----|-------|
| 84  | YL1F    | Unknown                                 | G1 | 33.89 |
| 85  | A2M     | Unknown                                 | G3 | 31.16 |
| 86  | 5812    | (Zheng58×Mo17)×Zheng58                  | G2 | 32.08 |
| 87  | C42M    | Unknown                                 | G2 | 32.03 |
| 88  | D805    | D805-4-4                                | G2 | 33.22 |
| 89  | Ji35    | Derived from Huangzaosi                 | G2 | 30.23 |
| 90  | Ji53    | Jiqun2Co-2                              | G3 | 30.75 |
| 91  | R1      | Derived from tropical population S4     | G2 | 34.40 |
| 92  | R2      | Derived from tropical population S187   | G2 | 34.25 |
| 93  | R3      | Derived from tropical population S2     | G2 | 37.54 |
| 94  | R4      | Derived from tropical population S5     | G2 | 34.35 |
| 95  | R5      | Derived from tropical population S6     | G2 | 39.30 |
| 96  | R6      | Derived from tropical population S7     | G2 | 35.48 |
| 97  | R7      | Derived from tropical population S8     | G2 | 38.63 |
| 98  | R9      | Derived from tropical population Pob501 | G2 | 32.24 |
| 99  | R10     | Derived from tropical population Pob502 | G2 | 34.76 |
| 100 | R11     | Derived from tropical population Suwan  | G2 | 38.47 |
| 101 | N1      | Maize inbred line of N1 from U.S.       | G2 | 33.42 |
| 102 | N9      | Maize inbred line of N9 from U.S.       | G1 | 33.37 |
| 103 | N10     | Maize inbred line of N10 from U.S.      | G2 | 32.81 |
| 104 | N11     | Maize inbred line of N11 from U.S.      | G2 | 32.34 |
| 105 | N16     | Maize inbred line of N16 from U.S.      | G2 | 35.64 |
| 106 | N23     | Maize inbred line of N23 from U.S.      | G2 | 32.86 |
| 107 | N24     | Maize inbred line of N24 from U.S.      | G2 | 37.65 |
| 108 | N25     | Maize inbred line of N25 from U.S.      | G2 | 37.34 |
| 109 | N26     | Maize inbred line of N26 from U.S.      | G1 | 31.88 |
| 110 | A489    | Recycled line from hybrid Xianyu335     | G1 | 27.71 |
| 111 | LS335M  | Recycled line from hybrid Xianyu335     | G1 | 33.42 |
| 112 | T1020   | Y85×Cang7-2                             | G2 | 36.36 |
| 113 | T1021   | T75×T178                                | G3 | 37.18 |
| 114 | T1022   | E77×9045                                | G3 | 38.94 |
| 115 | T1023   | Zong3×Su951                             | G3 | 38.78 |
| 116 | T1024   | 4S×Chang7-2                             | G3 | 30.33 |
| 117 | T1025   | 4S×Dan598                               | G3 | 33.37 |
| 118 | Ji853   | Huangzaosi×Zi330                        | G2 | 34.56 |
| 119 | YG478   | Derived from of Ye478                   | G3 | 38.63 |
| 120 | LZF     | Unknown                                 | G2 | 39.61 |
| 121 | Xun9058 | 6JKxuanxi×8085                          | G3 | 37.85 |
| 122 | A19     | Unknown                                 | G2 | 32.65 |
| 123 | CM      | Unknown                                 | G3 | 36.21 |
| 124 | JS045-1 | Recycled line from hybrid 78599         | G3 | 38.16 |
| 125 | JS06730 | Recycled line from hybrid 78599         | G3 | 26.11 |
| 126 | T3001   | BSSS(R)C7                               | G1 | 31.26 |
| 127 | T3002   | BS13(S)C5                               | G1 | 34.92 |

|     |       |                           |    |       |
|-----|-------|---------------------------|----|-------|
| 128 | T3003 | (PA91 ×LH98) ×GA          | G2 | 34.66 |
| 129 | T3004 | PA91 ×LH98A               | G2 | 30.69 |
| 130 | T3005 | A619 ×L120                | G2 | 32.75 |
| 131 | T3006 | Oh43 ×L120                | G2 | 32.55 |
| 132 | T3007 | LH19 ×LH39                | G2 | 30.39 |
| 133 | T3008 | 778                       | G1 | 29.25 |
| 134 | T3009 | Funks                     | G1 | 30.28 |
| 135 | T3010 | (B37 ×644) ×B37           | G1 | 37.39 |
| 136 | T3011 | B73(2) ×H93               | G1 | 32.86 |
| 137 | T3012 | Va85 ×Pa91                | G2 | 38.73 |
| 138 | T3013 | Mo17 backcross 5 recovery | G2 | 33.58 |
| 139 | T3014 | Mo17(3) ×610              | G2 | 23.38 |
| 140 | T3015 | (Mo17 ×H99) ×LH53         | G2 | 31.11 |
| 141 | T3016 | LH55 ×LH47                | G2 | 31.62 |
| 142 | T3017 | (Mo17 ×ASA) ×Mo17         | G2 | 29.87 |
| 143 | T3018 | PH814 ×PH207              | G1 | 31.93 |
| 144 | T3019 | PH814 ×PH848              | G1 | 28.79 |

---

**Supplemental Table 2.** SNPs were detected for kernel moisture content at harvest stage in Nantong and Sanya

| SNP             | Bin  | Position  | Alleles | Nantong         |           | Sanya           |           |
|-----------------|------|-----------|---------|-----------------|-----------|-----------------|-----------|
|                 |      |           |         | $-\log_{10}(P)$ | $R^2$ (%) | $-\log_{10}(P)$ | $R^2$ (%) |
| 1_PZE-101194927 | 1.07 | 241912518 | A/C     |                 |           | 3.10            | 8.25      |
| 5_PZE-105042539 | 5.03 | 29708107  | A/C     | 3.30            | 10.38     | 3.18            | 7.34      |
| 5_PZE-105093385 | 5.04 | 135189300 | A/G     | 3.35            | 9.76      | 3.47            | 6.61      |
| 5_PZE-105093414 | 5.04 | 135233554 | A/G     | 3.26            | 9.44      | 3.00            | 6.06      |
| 5_PZE-105093430 | 5.04 | 135278708 | A/G     | 3.34            | 9.69      | 3.52            | 6.95      |
| 5_PZE-105093464 | 5.04 | 135302345 | A/G     | 3.18            | 9.15      |                 |           |
| 8_PZE-108064150 | 8.04 | 114429371 | A/G     | 3.55            | 8.16      |                 |           |
| 8_PZE-108103951 | 8.06 | 159388825 | A/G     |                 |           | 3.55            | 10.18     |
| 9_PZE-109105795 | 9.06 | 147893495 | A/G     | 3.37            | 9.83      | 3.14            | 5.46      |

$R^2$ : percentage of phenotypic variance explained

**Supplemental Table 3.** The detailed information for eight maize inbred lines with low kernel moisture content

| SNP      | PZE-101194927 | PZE-105042539 | PZE-105093430 | PZE-108064150 | PZE-109105795 |
|----------|---------------|---------------|---------------|---------------|---------------|
| Allele   | C             | A             | G             | A             | G             |
| T75      | +             | -             | +             | +             | +             |
| 4A       | +             | -             | +             | +             | -             |
| Zong3    | -             | +             | +             | +             | +             |
| Luyuan92 | -             | -             | +             | +             | +             |
| T1003    | +             | +             | +             | +             | -             |
| T1011    | -             | -             | +             | -             | -             |
| JS06730  | +             | -             | -             | -             | +             |
| T3014    | -             | +             | +             | -             | +             |

+: the resistant allele is existent in this line; -: the resistant allele is non-existent in this line
